# Supplementary material for: Ni single atom catalyst with high Ni–Nx content for efficient electrocatalytic reduction of CO2
Source: Royal Society of Chemistry journal article supplement (doi:10.1039/d4cy01249f), 2024-12-13
Supplement: d4cy01249f1.pdf [file d4cy01249f1.pdf]

1

## Support information

2

### 3 **Ni single atom catalyst with high Ni-N<sub>x</sub> content for efficient** 4 **electrocatalytic reduction of CO<sub>2</sub>**

5 Yuting Feng <sup>a</sup>, Qing Mao <sup>\*,a</sup>, Hongbin Yang <sup>\*,b</sup>, Wei Zhou <sup>a</sup>, Dengye Yang<sup>a</sup>, Yanfei

6

Gao,<sup>d</sup>

7 <sup>a</sup> School of Chemical Engineering, Dalian University of Technology, Dalian 116024,

8 China

9 <sup>b</sup> School of Materials Science and Engineering, Suzhou University of Science and

10 Technology, Suzhou 215011, China

11 <sup>c</sup> Shanghai Triumph Energy Conservation Engineering Co., Ltd, Shanghai 200333,

12 China

13 <sup>\*</sup>Corresponding Author: Qing Mao, Hongbin Yang

14

15

16

## 1 **Supplementary Note 1: Product analysis and turnover frequency calculations**

2 The gas-phase products of the CO<sub>2</sub>RR were quantified using a gas  
3 chromatography (GC7900 Techcomp) system equipped with a nickel catalysis  
4 transition furnace, a thermal conductivity detector (TCD), and a flame ionization  
5 detector (FID). Gas bags were used to collect gas products at each potential for  
6 quantitative detection. The details for Faradaic efficiency calculations are shown in  
7 Supplementary Note 1. Liquid products were quantified using <sup>1</sup>H NMR spectroscopy  
8 (Bruker Avance II 400) by a water peak pressing procedure, in which dimethyl  
9 sulfoxide was chosen as the reference.

10 The Faradaic efficiencies (FE) of products in CO<sub>2</sub>RR were calculated from the areas of  
11 the gas chromatography as indicated below:

$$12 \quad FE(\%) = \frac{J_{co}}{J_{tot}} \times 100 \% = \frac{n_{co} \times N \times F}{I \times t} \times 100 \% \quad (\text{Eq. S1})$$

13 The Faradaic efficiencies (FE) of products in CO<sub>2</sub> pulsed electroreduction were  
14 calculated as indicated below:

$$15 \quad FE(\%) = \frac{J_{co}}{J_{tot}} \times 100 \% = \frac{n_{co} \times N \times F}{I \times t} \times 100 \% \quad (\text{Eq. S2})$$

16 where

17  $J_{co}$ : partial current density toward CO production;

18  $J_{tot}$ : total current density;

19  $N$ : number of electrons transferred, which is 2 for CO;

20  $n_{co}$ : the production rate of CO;

21  $F$ : Faradaic constant, 96485 C·mol<sup>-1</sup>

1

2 Turnover frequency (*TOF*) was estimated based on the following equation:

3 
$$TOF (h^{-1}) = \frac{CO_{molecule/h}}{Metal_{atom}} = \frac{I \cdot t \cdot FE_{CO} \cdot M_M}{n \cdot m_{catalyst} \cdot w_M \cdot F} \quad (\text{Eq. S3})$$

4 where

5  $CO_{molecule/h}$ : the number of CO molecules produced in 1 h;

6  $Metal_{atom}$ : the number of active metal atoms in the catalyst;

7  $J$ : the total current density of CO<sub>2</sub>RR at a specific potential;

8  $t$ : reaction time, 1 h (3600 s);

9  $FE_{CO}$ : Faradaic efficiency of CO;

10  $M_M$ : relative molecular mass of metal;

11  $n$ : the number of transferred electrons required to produce a CO molecule;

12  $m_{catalyst}$ : the quantity of the catalyst in the reaction;

13  $w_M$ : the mass fraction of active metal in the catalyst;

14

## 1 Supplementary Note 2: Thermodynamic calculations

2 Assuming that the individual Ni atoms in Ni/NC-x are the active sites in the CO<sub>2</sub>  
3 to CO electroreduction process, Table S1 lists the reaction rate equations corresponding  
4 to the elementary reaction steps (Table 1, E(1) ~ E(4)). The control equations are listed  
5 in Table S2. Here,  $r$  is the elementary reaction rate [mol·m<sup>-2</sup>·s<sup>-1</sup>],  $K$  is the reaction rate  
6 constant [mol·m<sup>-2</sup>·s<sup>-1</sup>],  $c$  is the concentration [mol·m<sup>-3</sup>], and  $\theta$  is coverage,  $\alpha$  is the  
7 symmetry coefficient,  $\eta$  is the overpotential [V],  $R$  is the gas constant [J·mol<sup>-1</sup>·K<sup>-1</sup>],  $T$   
8 is the temperature [K];  $\theta$  subscripts CO<sub>2</sub> and COOH represent the intermediates \*CO<sub>2</sub>  
9 and \*COOH, respectively;  $c$  subscripts CO<sub>2</sub> and HCO<sub>3</sub> represent the reactant CO<sub>2</sub> and  
10 electrolyte KHCO<sub>3</sub>, respectively.

11 **Table S1.** Reaction rate equations for the CO<sub>2</sub> electroreduction on the Ni/NC-x

$$r_1 = K_{101} \left( 1 - \theta_{CO_2,ads} - \theta_{COOH,ads} - \theta_{CO,ads} \right) \left( \frac{C_{CO_2}}{C^\ominus} \right) \quad (TS1.1)$$

$$r_{-1} = K_{102} \cdot \theta_{CO_2,ads} \quad (TS1.2)$$

$$r_2 = K_{201} \theta_{CO_2,ads} \left( \frac{C_{CO_2}}{C^\ominus} \right) \exp\left( \frac{\alpha F \eta}{RT} \right) \quad (TS1.3)$$

$$r_{-2} = K_{202} \cdot \theta_{COOH,ads} \left( \frac{C_{HCO_3^-}}{C^\ominus} \right) \cdot \exp\left( -\frac{(1-\alpha)F\eta}{RT} \right) \quad (TS1.4)$$

$$r_3 = K_{301} \cdot \theta_{COOH,ads} \left( \frac{C_{HCO_3^-}}{C^\ominus} \right) \cdot \exp\left( \frac{\alpha F \eta}{RT} \right) \quad (TS1.5)$$

$$r_{-3} = K_{302} \cdot \theta_{CO} \left( \frac{C_{HCO_3^-}}{C^\ominus} \right) \cdot \exp\left( -\frac{(1-\alpha)F\eta}{RT} \right) \quad (TS1.6)$$

$$r_4 = K_{401} \cdot \theta_{CO,ads} \quad (TS1.7)$$

$$r_{-4} = K_{402} \cdot \left( 1 - \theta_{CO_2,ads} - \theta_{COOH,ads} - \theta_{CO,ads} \right) \left( \frac{P_{CO}}{P^\ominus} \right) \quad (TS1.8)$$

1

2 **Table S2.** Control equations for the CO<sub>2</sub> electroreduction on the Ni/NC-x

---


$$C_{CO_2,surf} \frac{d\theta_{CO_2}}{dt} = r_1 - r_{-1} - r_2 + r_{-2} \quad (\text{TS2.} \quad 1)$$

$$C_{COOH,surf} \frac{d\theta_{COOH}}{dt} = r_2 - r_{-2} - r_3 + r_{-3} \quad (\text{TS2.} \quad 2)$$

$$C_{COOH,surf} \frac{d\theta_{COOH}}{dt} = r_2 - r_{-2} - r_3 + r_{-3} \quad (\text{TS2.} \quad 3)$$

$$C_{dl} \frac{dE}{dt} = j(t) - [(r_2 - r_{-2}) + (r_3 - r_{-3})] \cdot F/n \quad (\text{TS2.} \quad 4)$$


---

3

4 The kinetics parameters (**Table S3**) are obtained by fitting the four-step CO<sub>2</sub>RR  
 5 kinetics model with steady state internal resistance (IR) corrected CO<sub>2</sub>RR performance  
 6 (IR corrected potential as independent variable and CO partial current densities  
 7 as dependent variable) by means of a global optimization method, which is composed of  
 8 a random search using genetic algorithm and a local optimization employing trust-  
 9 region-reflective algorithm, that was reported by our previous publications [1,2].

10

11 [1] Qing Mao, Ulrike Krewer, *Electrochimica Acta*, 2013,103:188-19812 [2] Qing Mao, Ulrike Krewer, *Electrochimica Acta*, 2012, 68:60-68

13

14

1 **Table S3.** Reaction kinetic constants of the four step CO<sub>2</sub>RR

|           | Ni/NC-0                | Ni/NC-2:1              |
|-----------|------------------------|------------------------|
| $K_{101}$ | $2.13 \times 10^{11}$  | $1.06 \times 10^{10}$  |
| $K_{102}$ | $3.32 \times 10^{10}$  | $1.59 \times 10^6$     |
| $K_{201}$ | $3.72 \times 10^{-05}$ | $1.69 \times 10^{-03}$ |
| $K_{202}$ | $5.59 \times 10^{08}$  | $9.09 \times 10^{09}$  |
| $K_{301}$ | $1.70 \times 10^{03}$  | $3.12 \times 10^{02}$  |
| $K_{302}$ | $1.83 \times 10^{06}$  | $4.54 \times 10^{05}$  |
| $K_{401}$ | $9.48 \times 10^{06}$  | $4.07 \times 10^{07}$  |
| $K_{402}$ | $3.75 \times 10^{-09}$ | $3.47 \times 10^{-05}$ |

2

3 The thermodynamic energy barrier can be calculated from standard free energy of  
 4 formation  $\Delta G_f^\circ$  values of the reactants and products involved in the CO<sub>2</sub>RR, which is  
 5 the sum of the energy barriers of each elementary reaction. This relation is expressed  
 6 by formula Eq. S4:

$$7 \quad \Delta G = \Delta G_1 + \Delta G_2 + \Delta G_3 + \Delta G_4 \quad (\text{Eq. S4})$$

8 The numerical relationship between the binding energy and the kinetic constant of  
 9 each intermediate in the reaction process can be determined according to arrhenius  
 10 equation. Therefore, the kinetic constant and the thermodynamic energy barrier are  
 11 explicitly coupled in numerical form. Then the thermodynamic energy barrier of each  
 12 intermediate in the reaction process can be simulated by Eq. S5

$$13 \quad \Delta G = -RT \ln K^\ominus \quad (\text{Eq. S5})$$

1

## 2 **Supplementary Note 3: Experimental details**

### 3 **Electrode preparation for the H-cell**

4 In a typical procedure, 10 mg of Ni/NC-x catalysts, and 40  $\mu\text{L}$  of 5 wt. % Nafion  
5 solution (in ethanol/water) were dispersed in a 960  $\mu\text{L}$  of mixture of water and  
6 isopropanol (volume ratio=1:1) to form a homogeneous ink by 60 min of  
7 ultrasonication. Subsequently, 100  $\mu\text{L}$  of the ink were loaded onto a carbon paper  
8 electrode (AvCarb P75T,  $1\times 1\text{ cm}^2$ ) to obtain a catalyst loading of  $1\text{ mg/cm}^2$ .

### 9 **Electrode preparation for flow cell**

10 Preparation of GDE: After sonication of 10 mg XC-72 and 250  $\mu\text{L}$  anhydrous  
11 ethanol for 10 minutes, 250  $\mu\text{L}$  of 10 wt% PTFE was added, stirred well, and then the  
12 mixture was brushed onto carbon paper. Finally, the carbon paper was baked at  $340\text{ }^\circ\text{C}$   
13 for 1 hour.

14 Preparation of catalyst ink: 10 mg catalyst was added to 100  $\mu\text{L}$  deionized water  
15 and ultrasonicated for 20 min, followed by the addition of 95  $\mu\text{L}$  anion exchange resin  
16 mixture (6 mg of anion exchange resin dissolved in 95 mL anhydrous ethanol and 95  
17 mL acetone), and the resulting ink was brushed onto GDE ( $2\times 2\text{ cm}^2$ ) with a loading of  
18  $2\text{ mg/cm}^2$ .

19

## 1 Supplementary Figures and Tables

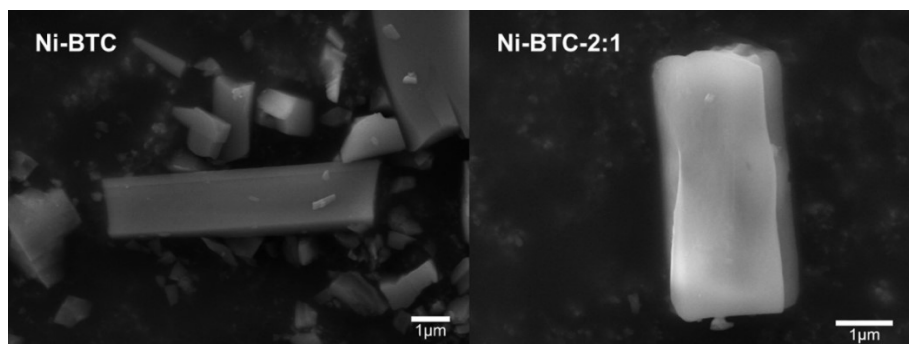

2

3

**Figure S1.** SEM image of Ni-BTC-0 and Ni-BTC-2:1, scale bar 1 μm

4

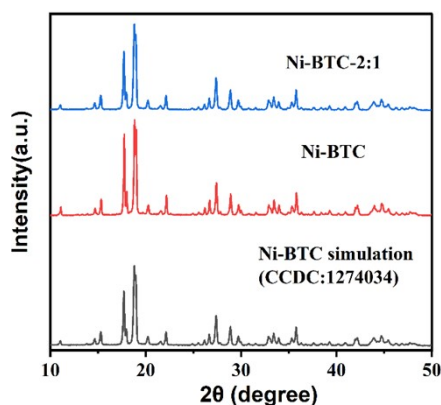

5

6

**Figure S2.** PXRD patterns of Ni-BTC and Ni-BTC-2:1

7

The hydrothermal synthesis of Ni-BTC was achieved using nickel chloride

8

hexahydrate and homobenzoic acid in a dimethylformamide (DMF) medium. The

9

resulting Ni-based metal-organic framework (MOF) exhibits a regular rectangular

10

morphology and possesses a well-suited pore structure. The incorporation of

11

polyvinylpyrrolidone (PVP) during the hydrothermal process enables the effective

12

encapsulation of PVP within the MOF, without compromising the surface morphology

13

or the physical phase integrity of Ni-BTC.



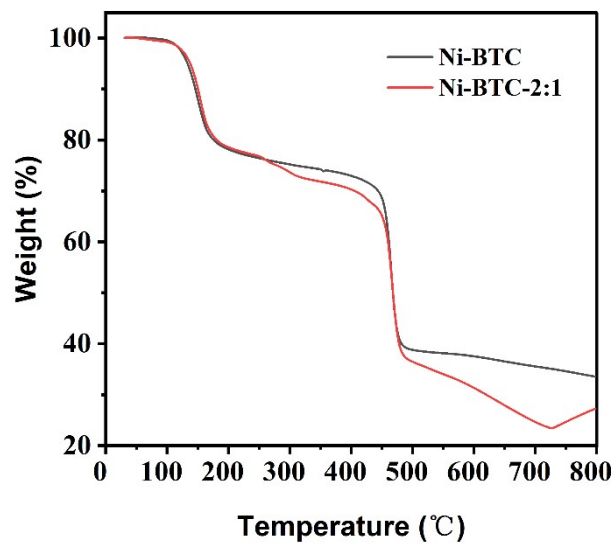

1  
2  
3  
4  
5

**Figure S3.** Thermogravimetric analysis (TGA) curves of Ni-BTC (black) and Ni-BTC-2:1 (red) measured in Ar atmosphere

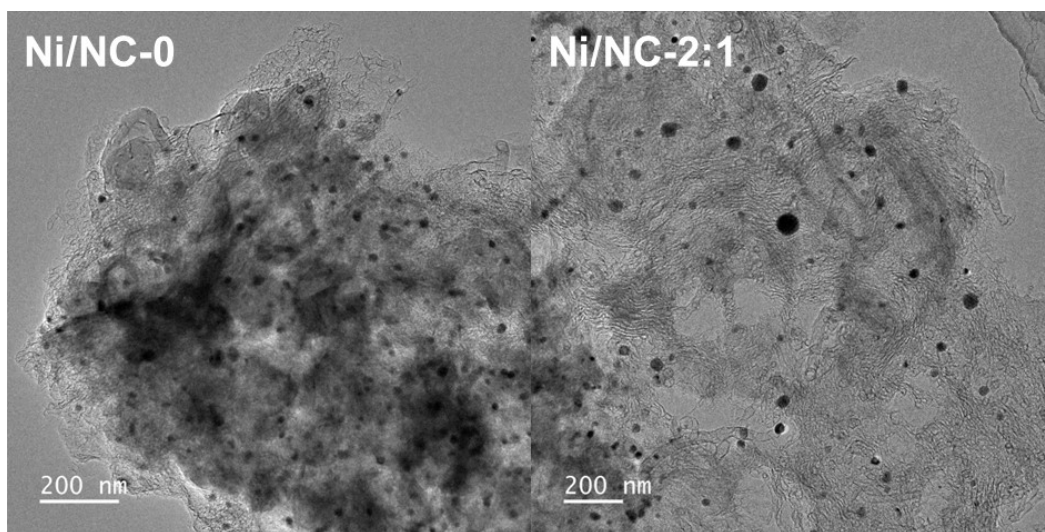

6  
7  
8  
9

**Figure S4.** TEM image of Ni/NC-0 and Ni/NC-2:1

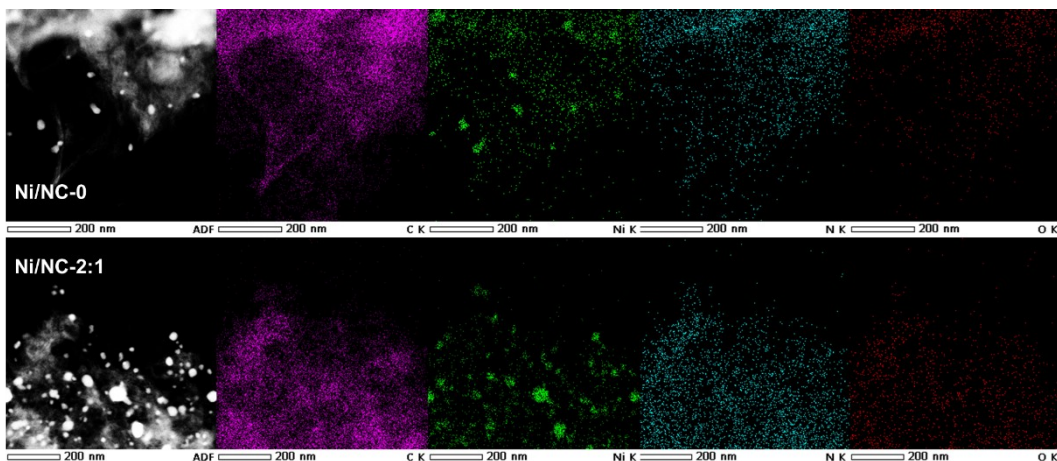

1

2

3

**Figure S5.** Elemental mappings of Ni/NC-0

4

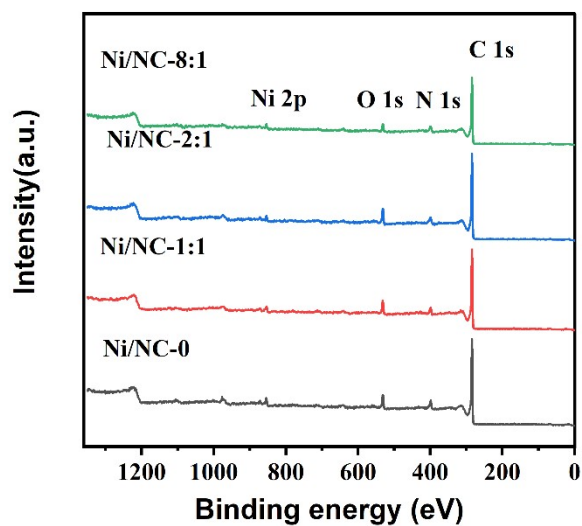

5

6

**Figure S6.** XPS survey of Ni/NC-0, Ni/NC-1:1, Ni/NC-2:1 and Ni/NC-8:1

7

8

9

**Table S4.** Ni contents in various catalysts determined by ICP-AES and XPS

| Content         | Ni/NC-0 | Ni/NC-1:1 | Ni/NC-2:1 | Ni/NC-8:1 |
|-----------------|---------|-----------|-----------|-----------|
| ICP-AES (%(wt)) | 4.64%   | 5.96%     | 5.12%     | 5.34%     |
| XPS (%(at))     | 1.92%   | 1.66%     | 1.68%     | 1.42%     |

1

**Table S5.** XPS N1s element analysis results

| Catalyst  | Pyridinic N | Ni-N   | Pyrrolic N | Graphitic N | Oxidized N |
|-----------|-------------|--------|------------|-------------|------------|
| Ni/NC-0   | 48.11%      | 7.76%  | 16.49%     | 15.11%      | 12.53%     |
| Ni/NC-1:1 | 47.86%      | 12.25% | 15.43%     | 15.59%      | 8.86%      |
| Ni/NC-2:1 | 46.8%       | 15.36% | 13.74%     | 13.4%       | 10.71%     |
| Ni/NC-8:1 | 48.7%       | 10.47% | 16.61%     | 15.09%      | 9.13%      |

2

**Table S6.** The nitrogen adsorption/desorption measurement results of various catalysts

| Samples                                              | Ni/NC-0 | Ni/NC-1:1 | Ni/NC-2:1 | Ni/NC-8:1 |
|------------------------------------------------------|---------|-----------|-----------|-----------|
| BET surface area( $\text{m}^2 \cdot \text{g}^{-1}$ ) | 196.25  | 194.85    | 176.82    | 179.32    |
| Pore volume( $\text{cm}^3 \cdot \text{g}^{-1}$ )     | 0.44    | 0.48      | 0.44      | 0.41      |

4

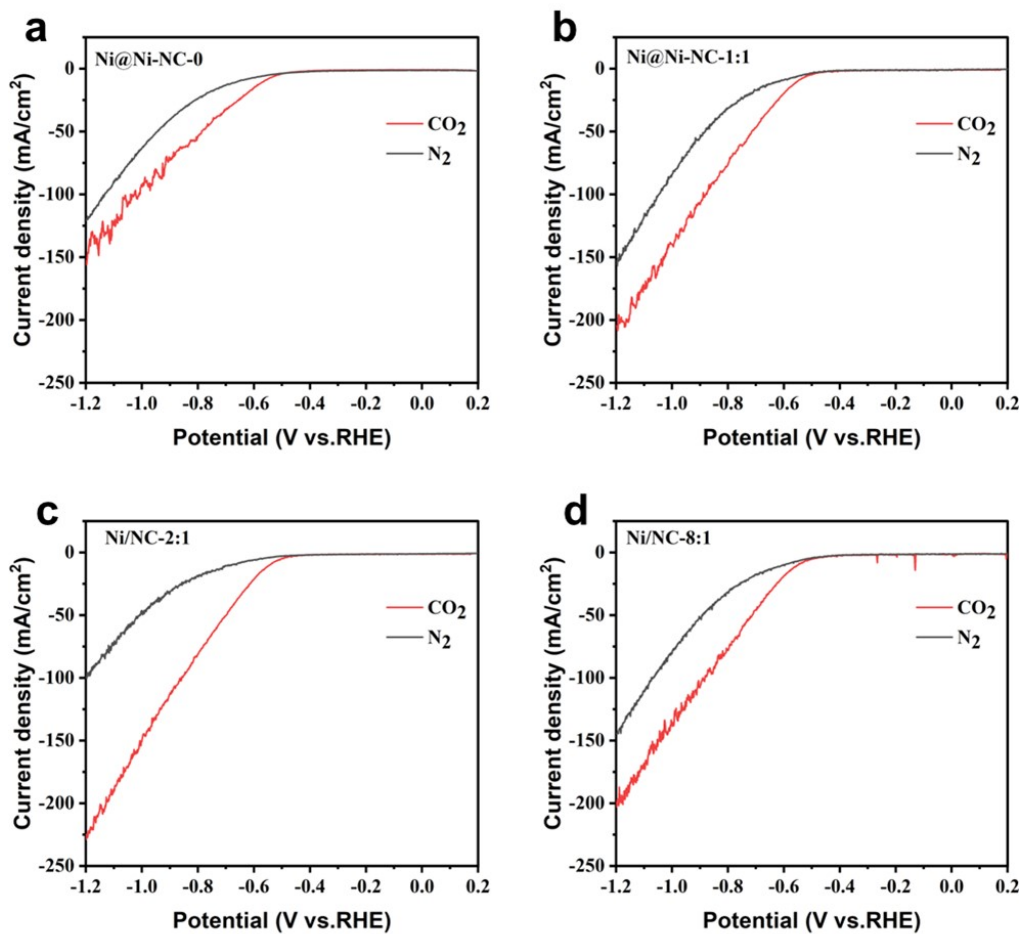

1

2

**Figure S7.** LSV of Ni/NC-x in CO<sub>2</sub>-saturated and N<sub>2</sub>-saturated electrolytes

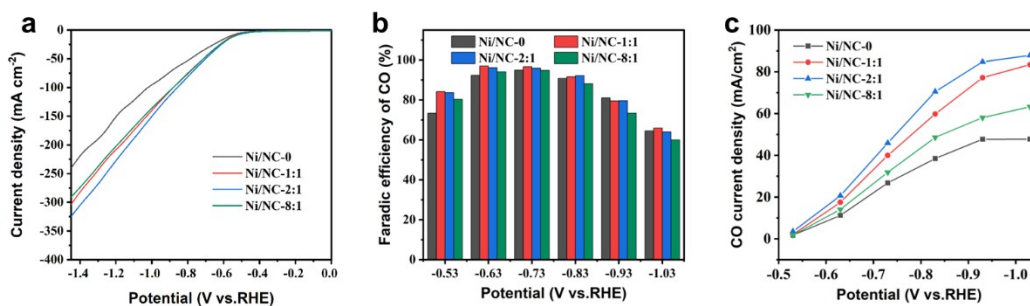

3

**Figure S8.** (a) LSV, (b) CO Faradic efficiency and (c) CO current density of Ni/NC-x in CO<sub>2</sub>-saturated

5

electrolytes

6

7

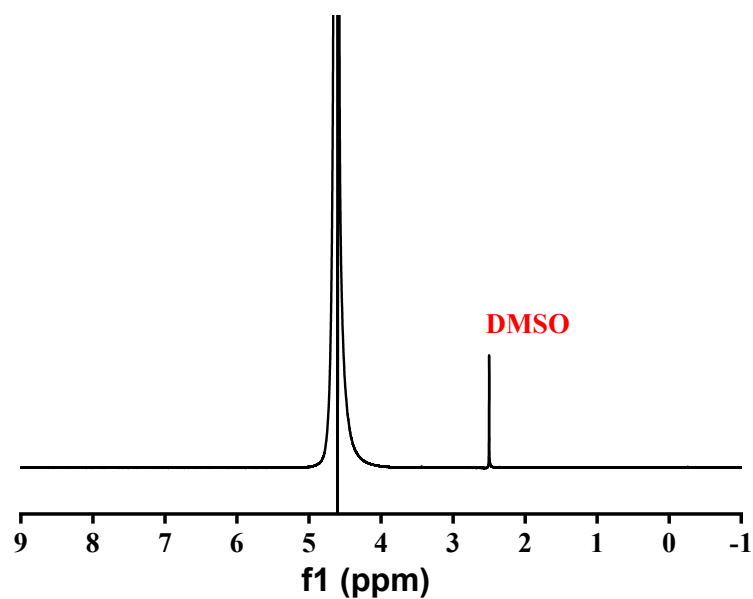

1  
2  
3  
4  
5

**Figure S9.**  $^1\text{H}$  nuclear magnetic resonance (NMR) spectra of the electrolyte after 30 mins  $\text{CO}_2$  reduction electrolysis at  $-0.73$  V vs. RHE for Ni/NC-2:1.

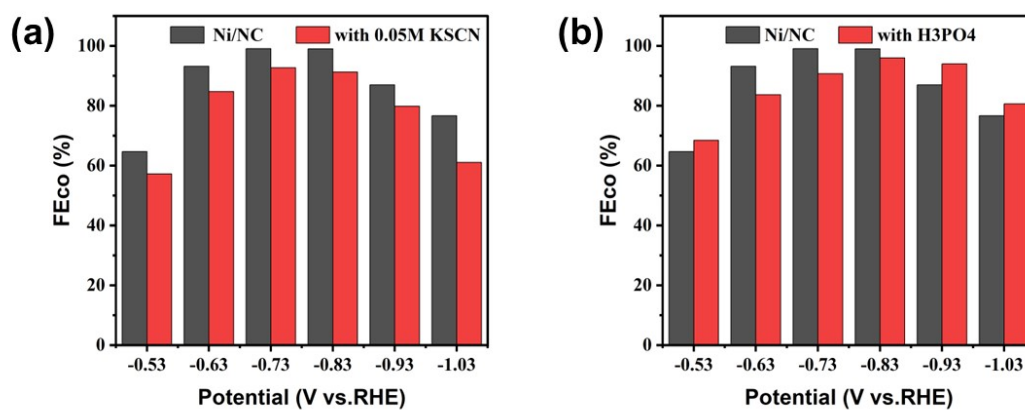

6  
7  
8  
9

**Figure S10.**  $\text{FE}_{\text{CO}}$  of Ni/NC from the  $\text{CO}_2\text{RR}$  in  $\text{CO}_2$ -saturated  $0.5$  M  $\text{KHCO}_3$  without and with  $0.05\text{M}$  KSCN. (e)  $\text{FE}_{\text{CO}}$  of Ni/NC from the  $\text{CO}_2\text{RR}$  in  $\text{CO}_2$ -saturated  $0.5$  M  $\text{KHCO}_3$  electrolyte without and with  $0.1$  M  $\text{H}_3\text{PO}_4$  treatment

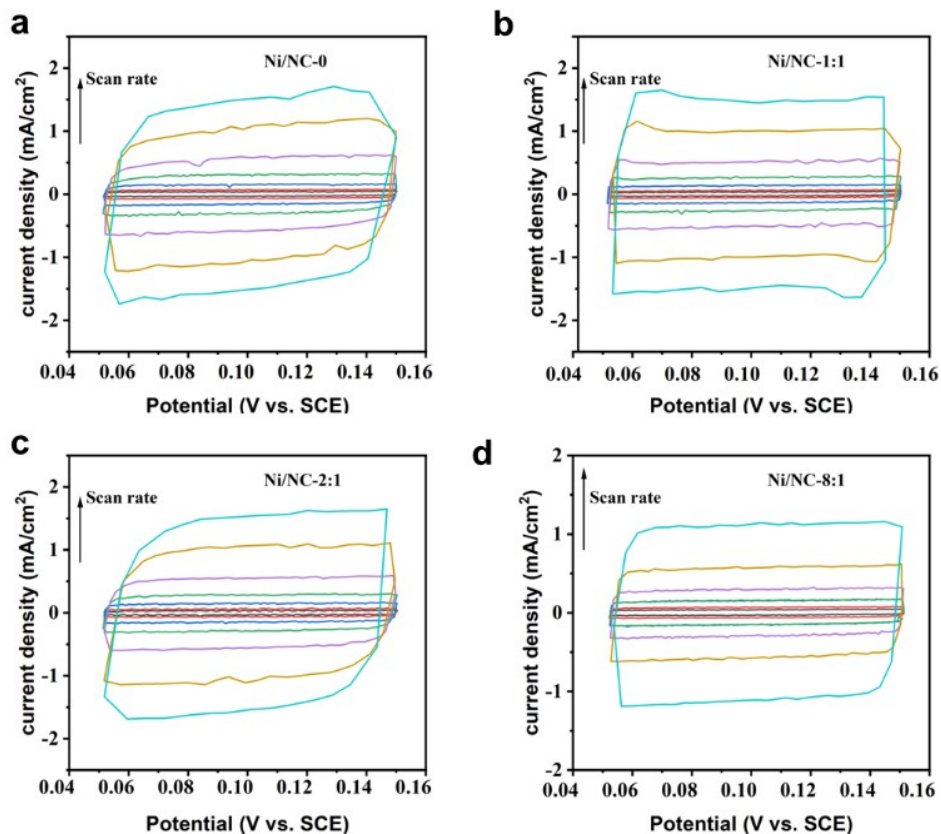

1  
 2 **Figure S11.** Cyclic voltammograms of the (a) Ni/NC-0, (b) Ni/NC-1:1, (c) Ni/NC-2:1 and (d) Ni/NC-  
 3 8:1 recorded between 0.05-0.15V vs. RHE at the different sweep rate in CO<sub>2</sub>-saturated 0.5 M KHCO<sub>3</sub>  
 4 electrolyte.

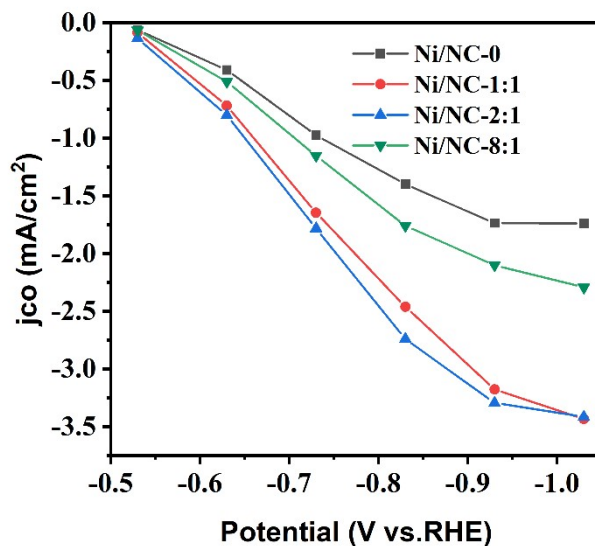

5  
 6 **Figure S12.** ECSA-normalizing CO current densities of Ni/NC-0, Ni/NC-1:1, Ni/NC-2:1 and Ni/NC-  
 7 8:1.  
 8

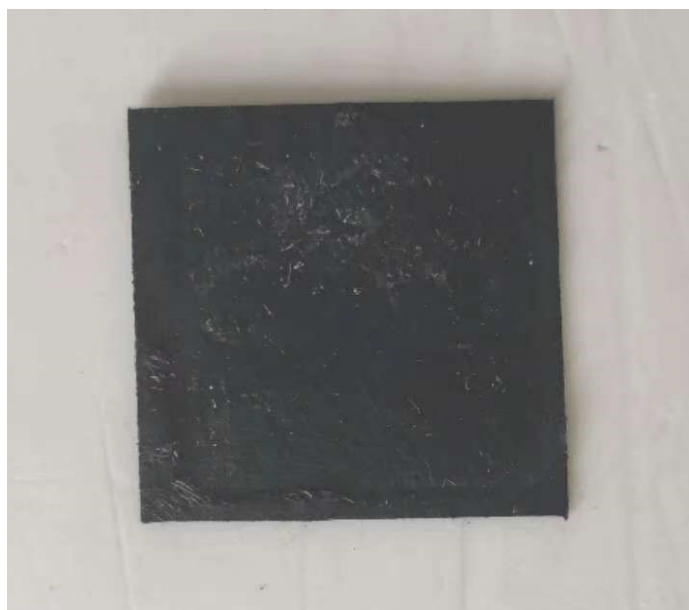

**Figure S13.** GDE after 10h reaction in 1M KOH (carbonate formation on the surface)

1  
2  
3  
4  
5  
6  
7  
8  
9  
10

11 **Table S7. Summary of the performances of recent Ni-based SACs for the CO<sub>2</sub>RR toward CO**

| catalysts    | FE <sub>CO</sub> (%) | <i>j</i> <sub>CO</sub> (mA/cm <sup>2</sup> ) | Potential (V) | Electrolyte            | Cell system |
|--------------|----------------------|----------------------------------------------|---------------|------------------------|-------------|
| Ni-SAs-NC[1] | 75                   | 31                                           | -0.96         | 0.5M KHCO <sub>3</sub> | H-cell      |
| NiSA@N3-C[2] | 96.0                 | 18.87                                        | -0.83         | 0.5M KHCO <sub>3</sub> | H-cell      |
| Ni-SAC@NC[3] | 95                   | 5.7                                          | -0.60         | 0.5M KHCO <sub>3</sub> | H-cell      |
| Ni-N-C[4]    | 94                   | ~10                                          | -0.60         | 0.5M KHCO <sub>3</sub> | H-cell      |
| Ni@NCNTs[5]  | 99.1                 | ~13                                          | -0.90         | 0.5M KHCO <sub>3</sub> | H-cell      |
| Ni-Zn-N-V[6] | 99                   | 17                                           | -0.80         | 0.5M KHCO <sub>3</sub> | H-cell      |

|                             |      |       |       |                        |        |
|-----------------------------|------|-------|-------|------------------------|--------|
| Ni/NC[7]                    | 96.5 | 12.6  | -0.90 | 0.1M KHCO <sub>3</sub> | H-cell |
| Ni <sub>3</sub> -NC-1000[8] | 98.2 | 6.86  | -0.9  | 0.1M KHCO <sub>3</sub> | H-cell |
| Ni-HPNCF[9]                 | 90   | 49.6  | -1    | 0.5M KHCO <sub>3</sub> | H-cell |
| Ni-N/OMC-1[10]              | ~100 | 27    | -1    | 0.5M KHCO <sub>3</sub> | H-cell |
| Ni-NUK-900[11]              | 94   | 3.4   | -0.73 | 0.5M KHCO <sub>3</sub> | H-cell |
| Ni-N-C[12]                  | 91.2 | 10.8  | -0.9  | 0.5M KHCO <sub>3</sub> | H-cell |
| This work                   | 95   | 46.88 | -0.73 | 0.5M KHCO <sub>3</sub> | H-cell |

1  
2  
3  
4  
5  
6  
7

8 **Table S8. The binding energies of the Ni/NC-0 and Ni/NC-2:1 to the reaction intermediates**

|                 | Ni/NC-0 | Ni/NC-2:1 |
|-----------------|---------|-----------|
| $\Delta G_1/eV$ | -0.0478 | -0.2262   |
| $\Delta G_2/eV$ | 0.7796  | 0.7530    |
| $\Delta G_3/eV$ | 0.1795  | 0.1871    |
| $\Delta G_4/eV$ | -0.9112 | -0.7140   |

9  
10

- 11 [1] W. Wang, C. Cao, K. Wang, T. Zhou, Boosting CO<sub>2</sub> electroreduction to CO with abundant  
12 nickel single atom active sites, *Inorg. Chem. Front.* 8 (2021) 2542–2548.  
13 <https://doi.org/10.1039/D1QI00126D>.  
14 [2] L. Qiu, S. Shen, C. Ma, C. Lv, X. Guo, H. Jiang, Z. Liu, W. Qiao, L. Ling, J. Wang,  
15 Controllable fabrication of atomic dispersed low-coordination nickel-nitrogen sites for highly



- 1 efficient electrocatalytic CO<sub>2</sub> reduction, *Chemical Engineering Journal* 440 (2022) 135956.  
2 <https://doi.org/10.1016/j.cej.2022.135956>.
- 3 [3] X. Wang, S. Ding, T. Yue, Y. Zhu, M. Fang, X. Li, G. Xiao, Y. Zhu, L. Dai, Universal domino  
4 reaction strategy for mass production of single-atom metal-nitrogen catalysts for boosting  
5 CO<sub>2</sub> electroreduction, *Nano Energy* 82 (2021) 105689.  
6 <https://doi.org/10.1016/j.nanoen.2020.105689>.
- 7 [4] Z. Li, D. He, X. Yan, S. Dai, S. Younan, Z. Ke, X. Pan, X. Xiao, H. Wu, J. Gu, Size-Dependent  
8 Nickel-Based Electrocatalysts for Selective CO<sub>2</sub> Reduction, *Angewandte Chemie*  
9 *International Edition* 59 (2020) 18572–18577. <https://doi.org/10.1002/anie.202000318>.
- 10 [5] Y. Li, X.F. Lu, S. Xi, D. Luan, X. Wang, X.W. (David) Lou, Synthesis of N-Doped Highly  
11 Graphitic Carbon Urchin-Like Hollow Structures Loaded with Single-Ni Atoms towards  
12 Efficient CO<sub>2</sub> Electroreduction, *Angewandte Chemie International Edition* 61 (2022)  
13 e202201491. <https://doi.org/10.1002/anie.202201491>.
- 14 [6] S. Shen, C. Han, B. Wang, Y. Wang, Self-Supported Nickel Single Atoms Overwhelming the  
15 Concomitant Nickel Nanoparticles Enable Efficient and Selective CO<sub>2</sub> Electroreduction,  
16 *Adv. Mater. Interfaces* 8 (2021) 2101542. <https://doi.org/10.1002/admi.202101542>.
- 17 [7] G. Hwa Jeong, Y. Chuan Tan, J. Tae Song, G.-Y. Lee, H. Jin Lee, J. Lim, H. Young Jeong, S.  
18 Won, J. Oh, S. Ouk Kim, Synthetic multiscale design of nanostructured Ni single atom  
19 catalyst for superior CO<sub>2</sub> electroreduction, *Chemical Engineering Journal* 426 (2021) 131063.  
20 <https://doi.org/10.1016/j.cej.2021.131063>.
- 21 [8] G.-D. Park, S. Sirisomboonchai, K. Norinaga, Facile Synthesis and Insight of Atomically  
22 Dispersed Ni Catalyst on N-doped Carbonized Lignin for Highly Efficient Electrochemical  
23 CO<sub>2</sub> Reduction to CO, *ChemSusChem* (2023) e202300530.  
24 <https://doi.org/10.1002/cssc.202300530>.
- 25 [9] I. Song, Y. Eom, M.A. P, D.H. Hong, M. Balamurugan, R. Boppella, D.H. Kim, T.K. Kim,  
26 Geometric and Electronic Structural Engineering of Isolated Ni Single Atoms for a Highly  
27 Efficient CO<sub>2</sub> Electroreduction, *Small* n/a (n.d.) 2300049.  
28 <https://doi.org/10.1002/sml.202300049>.
- 29 [10] Q.-X. Li, D.-H. Si, W. Lin, Y.-B. Wang, H.-J. Zhu, Y.-B. Huang, R. Cao, Highly efficient  
30 electroreduction of CO<sub>2</sub> by defect single-atomic Ni-N<sub>3</sub> sites anchored on ordered micro-  
31 macroporous carbons, *Sci. China Chem.* (2022). <https://doi.org/10.1007/s11426-022-1263-5>.
- 32 [11] X. Chen, W. Liu, Y. Sun, T. Tan, C. Du, Y. Li, KOH-Enabled Axial-Oxygen Coordinated Ni  
33 Single-Atom Catalyst for Efficient Electrocatalytic CO<sub>2</sub> Reduction, *Small Methods* 7 (2023)  
34 2201311. <https://doi.org/10.1002/smt.202201311>.
- 35 [12] C.-Z. Yuan, K. Liang, X.-M. Xia, Z.K. Yang, Y.-F. Jiang, T. Zhao, C. Lin, T.-Y. Cheang,  
36 S.-L. Zhong, A.-W. Xu, Powerful CO<sub>2</sub> electroreduction performance with N-carbon doped  
37 with single Ni atoms, *Catal. Sci. Technol.* 9 (2019) 3669–3674.  
38 <https://doi.org/10.1039/C9CY00363K>.
